# Supplementary material for: ZrO2 Superhydrophobic Coating with an Excellent Corrosion Resistance and Stable Degradation Performance on Zr-Based Bulk Metallic Glass
Source: MDPI journal article supplement (doi:10.3390/ma17010118), 2023-12-26
Supplement: s1 [file s1]

**ZrO<sub>2</sub> superhydrophobic coating with excellent corrosion resistance and stable degradation performance on Zr-based bulk metallic glass**

Ranfeng Wei<sup>a</sup>, Rui Zheng<sup>b</sup>, Chaojun Li<sup>a</sup>, Wei Wang<sup>a</sup>, Hao Zhang<sup>b</sup>, Qijing Sun<sup>a</sup>, Jingwang Lv<sup>a</sup>,

Guoyang Zhang<sup>a</sup>, Li Liu<sup>b,\*</sup>, Xiangjin Zhao<sup>a,\*</sup>

<sup>a</sup> College of Nuclear Equipment and Nuclear Engineering, Yantai University, No. 30 Qingquan Road, Shandong, 264005, China

<sup>b</sup> School of Environmental and Material Engineering, Yantai University, No. 30 Qingquan Road, Shandong, 264005, China

\*Corresponding author.

E-mail address: 15053532471@163.com (L. Liu); zl2915@ytu.edu.cn (X.J. Zhao).

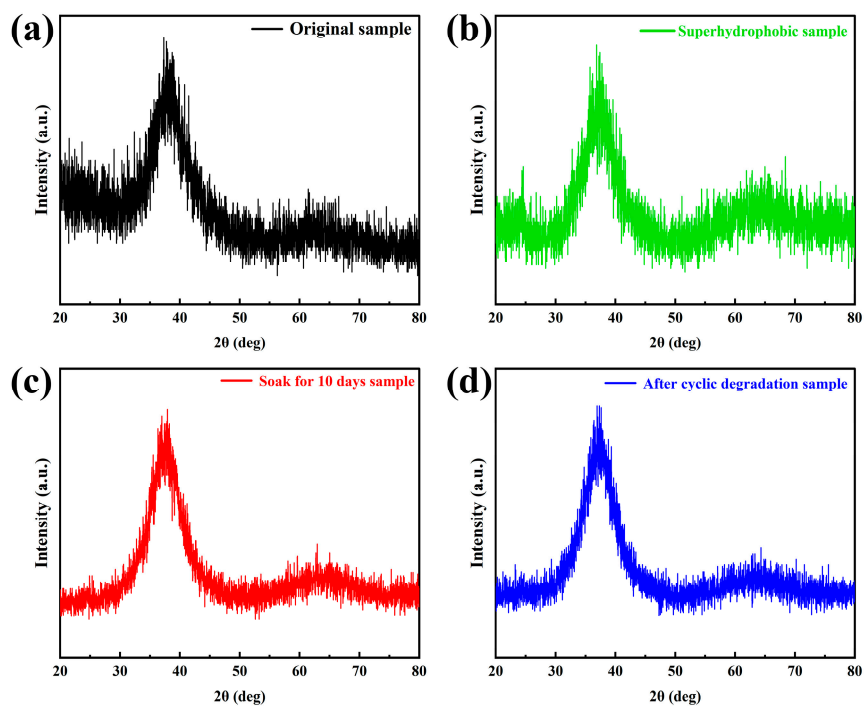

**Figure S1** The XRD pattern of sample surface: (a) Original metal glass, (b) Original superhydrophobic coating, (c) Coating after soaking for 10 days, (d) Coating after cyclic degradation test

**(a)**

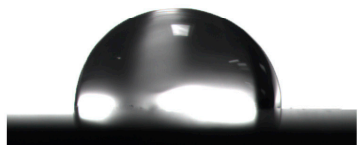

**(b)**

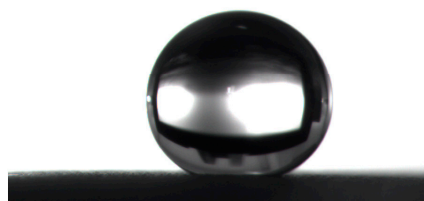

**Figure S2** (a) Water droplets on the surface of the original sample, (b) Water droplets on the surface of the superhydrophobic sample.

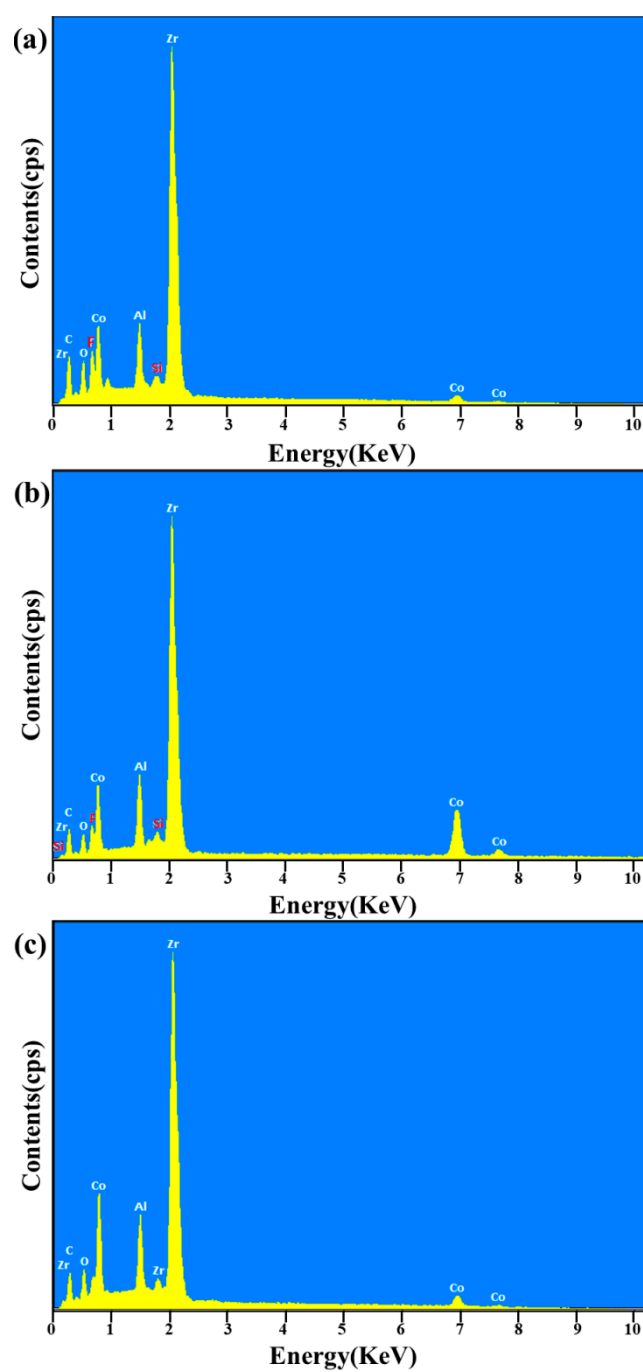

**Figure S3** The EDS spectrum of the surface: (a) Original superhydrophobic coating, (b) Coating after soaking for 10 days, (c) Coating after cyclic degradation test.

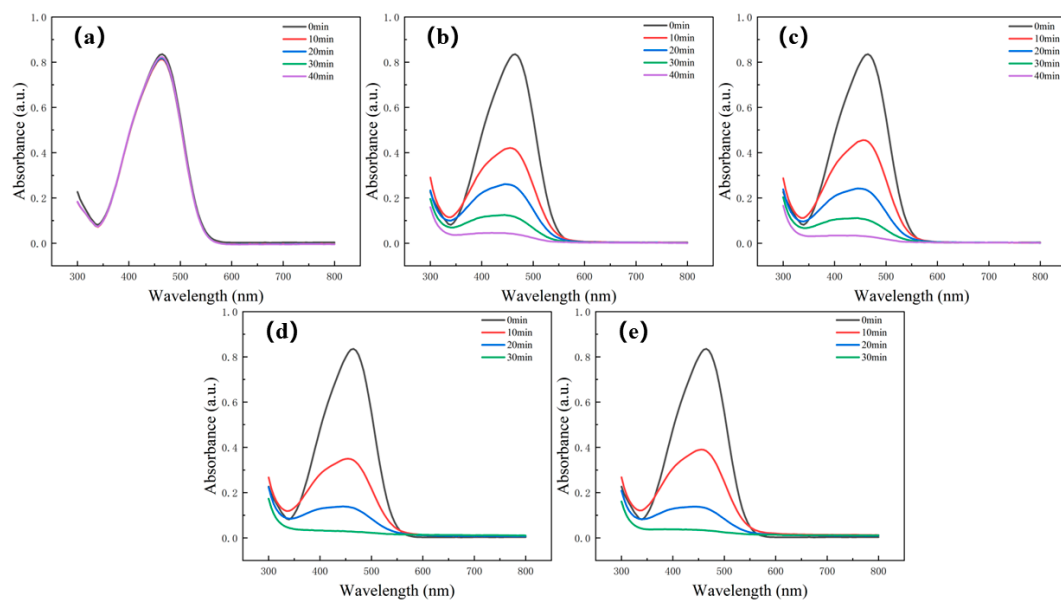

**Figure S4** Time dependent UV spectra of MO solution under different conditions: (a) only superhydrophobic sample, (b) only  $H_2O_2$ , (c) original sample and  $H_2O_2$ , (d) original superhydrophobic sample and  $H_2O_2$ , (e) superhydrophobic sample after soaking for 10 days and  $H_2O_2$ .
